# Supplementary material for: Potential carbon emissions dominated by carbon dioxide from thawed permafrost soils
Source: Springer Nature journal article supplement (doi:10.1038/nclimate3054), 2016-06-13
Supplement: 41558_2016_BFnclimate3054_MOESM474_ESM.pdf [file 41558_2016_BFnclimate3054_MOESM474_ESM.pdf]

# Potential carbon emissions dominated by carbon dioxide from thawed permafrost soils

Christina Schädel<sup>1\*</sup>, Martin K.F. Bader<sup>2</sup>, Edward A.G. Schuur<sup>1</sup>, Christina Biasi<sup>3</sup>, Rosvel Bracho<sup>4,5</sup>, Petr Čapek<sup>6</sup>, Sarah De Baets<sup>7</sup>, Kateřina Diáková<sup>6</sup>, Jessica Ernakovich<sup>8</sup>, Cristian Estop-Aragones<sup>7,9</sup>, David E. Graham<sup>10</sup>, Iain P. Hartley<sup>7</sup>, Colleen M. Iversen<sup>11</sup>, Evan Kane<sup>12</sup>, Christian Knoblauch<sup>13</sup>, Massimo Lupascu<sup>14</sup>, Pertti J. Martikainen<sup>3</sup>, Susan Natali<sup>15</sup>, Richard J. Norby<sup>11</sup>, Jonathan A. O'Donnell<sup>16</sup>, Taniya Roy Chowdhury<sup>10</sup>, Hana Šantrůčková<sup>6</sup>, Gaius Shaver<sup>17</sup>, Victoria L. Sloan<sup>11</sup>, Claire C. Treat<sup>18</sup>, Merritt R. Turetsky<sup>19</sup>, Mark P. Waldrop<sup>20</sup>, Kimberly P. Wickland<sup>21</sup>

<sup>1</sup>Center for Ecosystem Science and Society, Northern Arizona University, Flagstaff, AZ, USA

<sup>2</sup>New Zealand Forest Research Institute, Rotorua, New Zealand

<sup>3</sup>Department of Environmental and Biological Sciences, University of Eastern Finland, Kuopio, Finland

<sup>4</sup>Department of Biology, University of Florida, Gainesville, FL, USA

<sup>5</sup>School of Forest Resources and Conservation, University of Florida, Gainesville, FL, USA

<sup>6</sup>University of South Bohemia, Faculty of Science, Ceske Budejovice, Czech Republic

<sup>7</sup>Geography, College of Life and Environmental Sciences, University of Exeter, Exeter, UK

<sup>8</sup>CSIRO Agriculture, Adelaide, Australia

<sup>9</sup>Department of Renewable Resources, University of Alberta, Edmonton, AB, Canada

<sup>10</sup>Biosciences Division, Oak Ridge National Laboratory, Oak Ridge, TN, USA

<sup>11</sup>Environmental Sciences Division and Climate Change Science Institute, Oak Ridge National Laboratory, Oak Ridge, TN, USA

<sup>12</sup>School of Forest Resources and Environmental Science, Michigan Technological University, Houghton, MI, USA

<sup>13</sup>Institute of Soil Science, Universität Hamburg, Hamburg, Germany

<sup>14</sup>Department of Geography, National University of Singapore, Singapore

<sup>15</sup>Woods Hole Research Center, Falmouth, MA, USA

<sup>16</sup>Arctic Network, National Park Service, Anchorage, AK, USA

<sup>17</sup>The Ecosystem Center, Marine Biological Laboratory, Woods Hole, MA, USA

<sup>18</sup>Institute of Northern Engineering, University of Alaska Fairbanks, Fairbanks, AK, USA

<sup>19</sup>Department of Integrative Biology, University of Guelph, Guelph, Ontario, Canada

<sup>20</sup>US Geological Survey, Menlo Park, CA, USA

<sup>21</sup>US Geological Survey, Boulder, CO, USA

**Correspondence:** [christina.schaedel@nau.edu](mailto:christina.schaedel@nau.edu)

## **Additional Results**

Besides calculating the effect of a 10 °C increase in incubation temperature on total C release (sum of CO<sub>2</sub>-C and CH<sub>4</sub>-C), we also calculated the effect of increasing temperature on total C release when accounting for the higher GWP of CH<sub>4</sub>, which resulted in an almost identical increase in C release of 2.06 (Table S5).

Additionally, we looked at the effect of a 10 °C increase in incubation temperature on CH<sub>4</sub>-C release alone (anaerobic studies only). Over all studies the CH<sub>4</sub>-C release was 4.26 times higher with a 10 °C increase in temperature and no effects of ecosystem, soil type or permafrost condition were found (Fig. S1, Table S6, Table S12). Given that CH<sub>4</sub> accounts for a small portion of the total C release under anaerobic incubation conditions the overall ratio of C release with a 10 °C increase in incubation temperature did not differ for aerobic or anaerobic incubation conditions.

## **Sensitivity analysis**

We performed a sensitivity analysis that uses three different datasets to show that our conclusions about the low contribution of CH<sub>4</sub>-C to total anaerobic C emissions from the given incubation studies are robust. We performed the aerobic to anaerobic meta-analyses using the following three different datasets:

- a) The original dataset that includes all samples and studies as reported in the main text
- b) Only those studies were included for which more than 60% of the samples had reached maximum CH<sub>4</sub> rate during the incubation (see Table 17)
- c) Only those samples from individual incubation studies were included that had reached maximum CH<sub>4</sub> rate during the incubation (includes samples from all studies except for Diáková et al. (in revision). The difference to b) is that individual samples were explicitly excluded rather than studies, which are collections of individual samples.

Maximum CH<sub>4</sub> rate refers to the peak CH<sub>4</sub> rate and was determined based on daily rates over time. Table 18 shows the results from all three meta-analyses. The overall mean estimate (ratio of soil C release under aerobic versus anaerobic incubation conditions) is for a) 3.39 (95% CI from 2.22 to 5.18), for b) 3.65 (95% CI from 1.91 to 6.98) and for c) 3.81 (95% CI from 2.53 to 5.73) when using total C (sum of CO<sub>2</sub>-C + CH<sub>4</sub>-C). When also accounting for the higher Global Warming Potential of CH<sub>4</sub> (as CO<sub>2</sub>-C equivalent) the overall mean estimate for a) is 2.3 (95% CI from 1.55 to 3.4), for b) 2.7 (95% CI from 1.62 to 4.49), and for c) 2.26 (95% CI from 1.44 to 3.54).

In addition, we have also calculated the contribution of CH<sub>4</sub>-C to total anaerobic C release using the three different datasets. On average the contribution of CH<sub>4</sub>-C to total C is for a) 5.73% (95% CI from 2.74 to 8.73), for b) 5.59 (95% CI from -1.97 to 13.16), and for c) 7.5% (95% CI from 3.83 to 16.84; Supplementary Figure S2). Ecosystem and Temperature are only significant moderators for the original analysis, which includes all samples and studies. This sensitivity analysis shows that for all three datasets C release under anaerobic conditions is dominated by anaerobic CO<sub>2</sub>.

**Figure S1** | Ratio of CH<sub>4</sub>-C release with a 10° C increase in temperature. Studies are split into different ecosystems, soil types and permafrost conditions (numbers in brackets represent number of observations for each subgroup). The arrow indicates that the confidence interval (CI) is wider than the space.

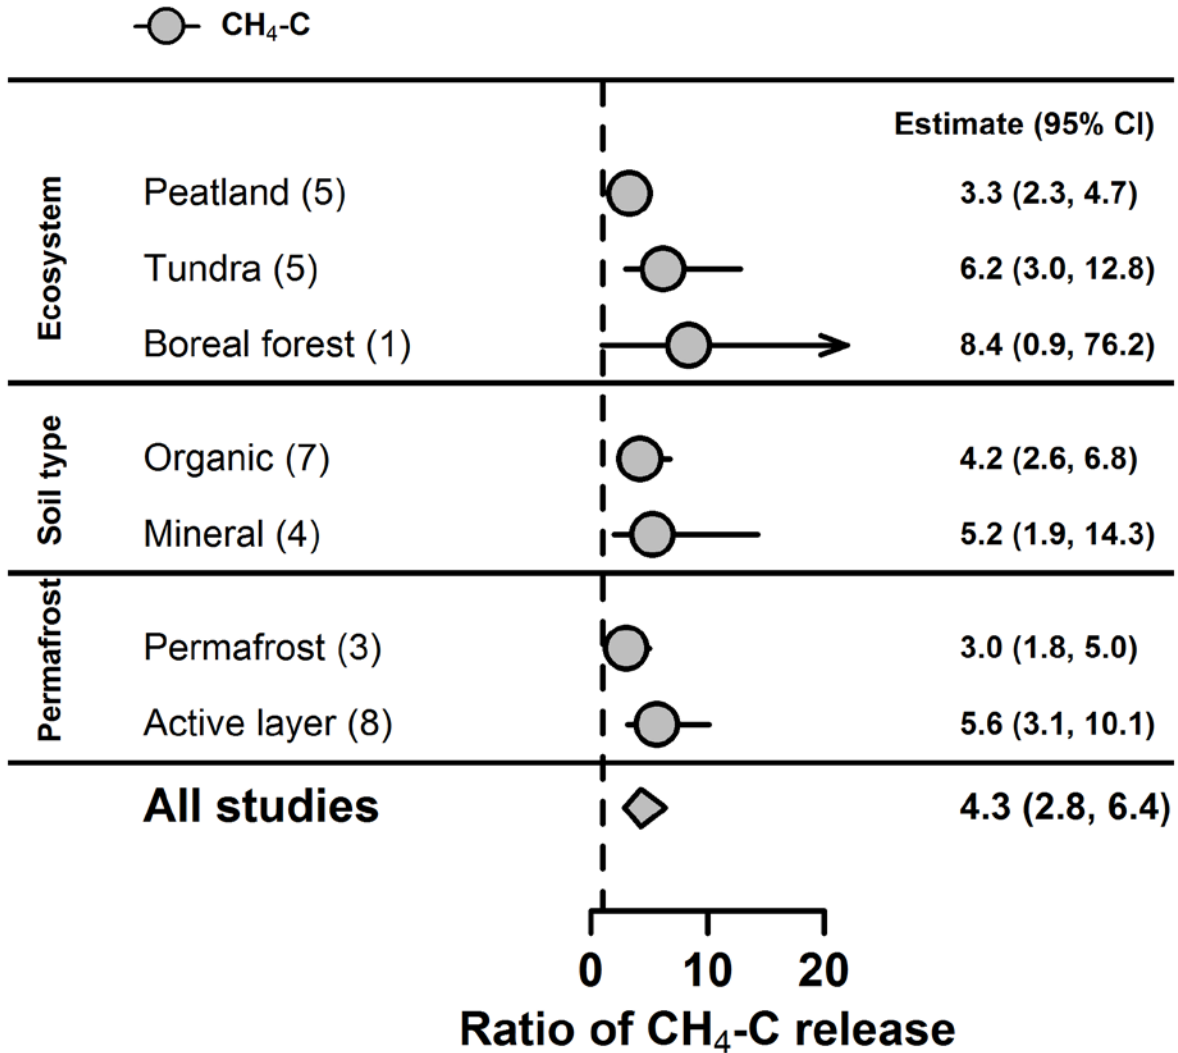

**Figure S2** | Contribution of CH<sub>4</sub>-C to total anaerobic C release for the three datasets used in the sensitivity analysis. Black squares represent boreal forest, dark circles peatland and light grey triangles tundra ecosystems. Symbols represent observations from different observations and error bars show standard deviation within an observation. Figure S2a is the same as Fig. 3 in the main text. In a) lines represent the average predicted relationship between CH<sub>4</sub>-C contributions to total anaerobic C release and incubation temperature for the three given ecosystems. For b) and c) neither ecosystem nor temperature were significant moderators. For a) mean over all observations = 5.73% (95% CI 2.74, to 8.73); for b) mean of all observations = 5.59 (95% CI -1.97 to 13.16); for c) mean over all observations = 7.5% (95% CI 3.83 to 16.84).

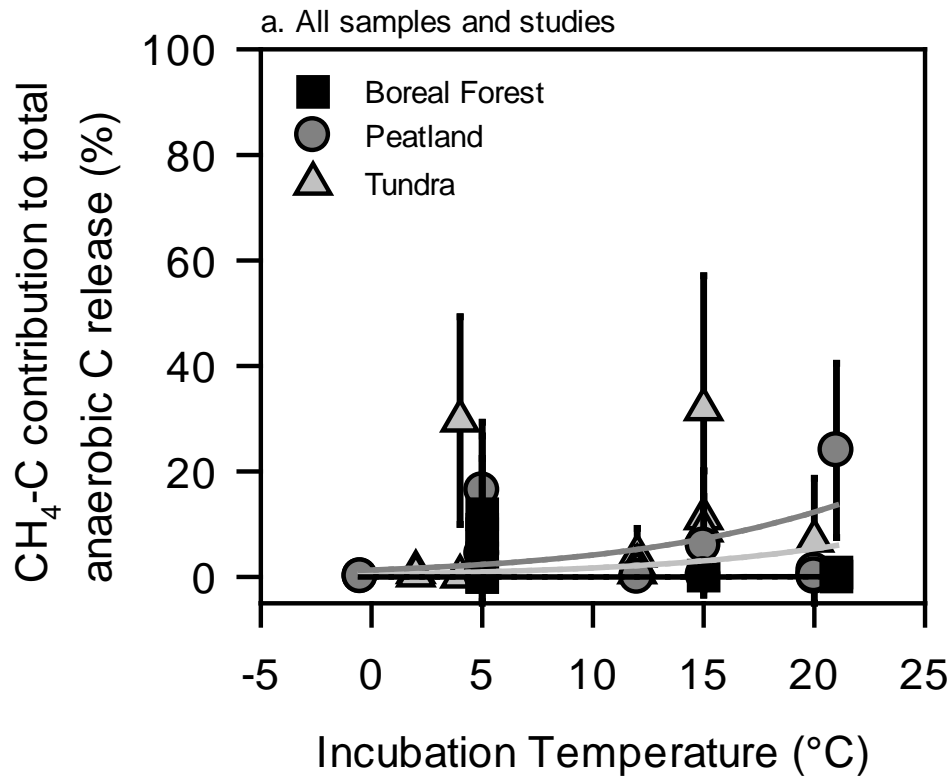

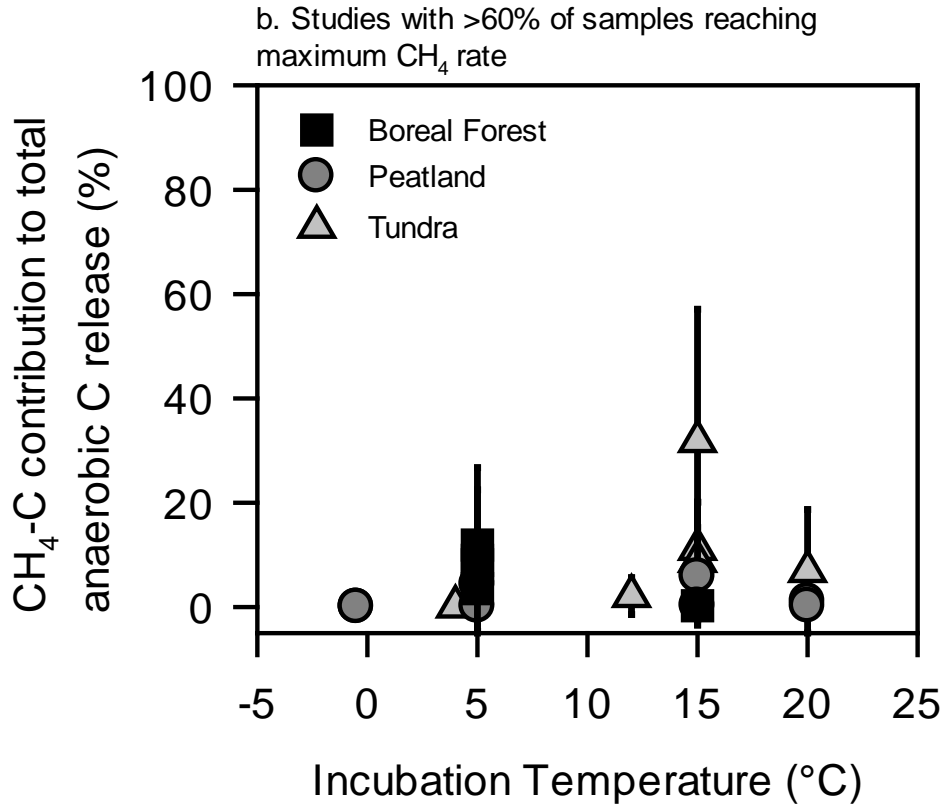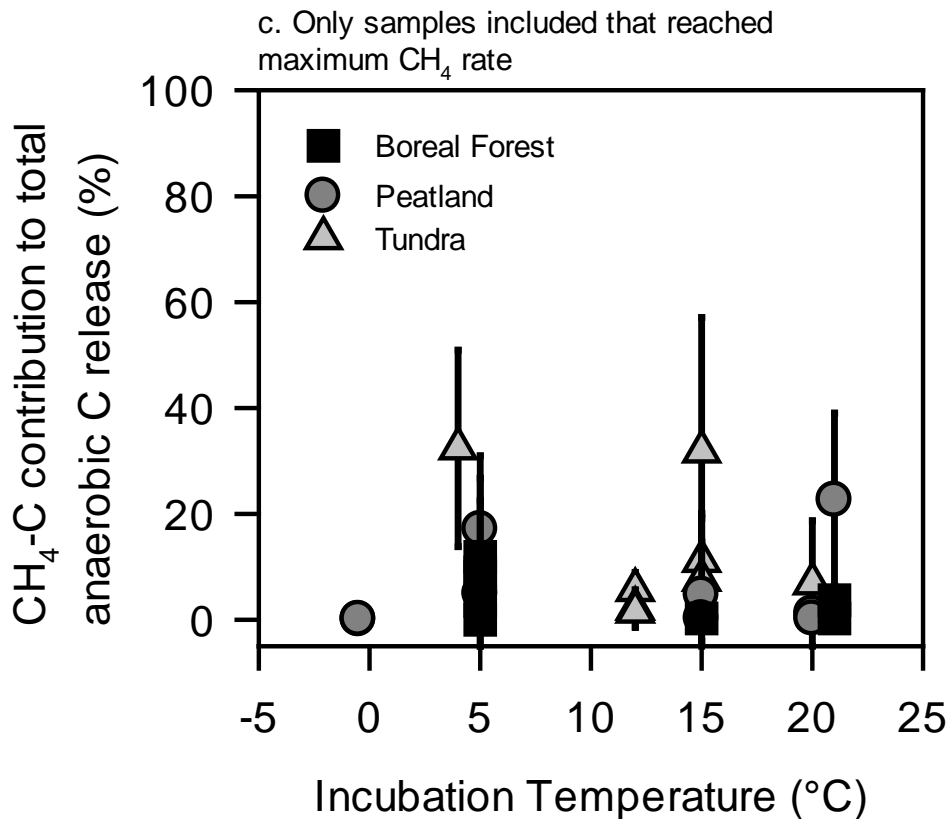

**Table S1** | Study details with treatment, incubation temperature used in the meta-analysis, ecosystem, permafrost, soil type, and incubation length.

| Citation                                              | Treatment <sup>a</sup> | Used incubation temperatures (°C) | Ecosystem <sup>b</sup> | Permafrost <sup>c</sup> | Soil type <sup>d</sup> | Incubation length (days) |
|-------------------------------------------------------|------------------------|-----------------------------------|------------------------|-------------------------|------------------------|--------------------------|
| Bracho et al. (2016) <sup>1</sup>                     | T                      | 15, 25                            | tundra                 | al, p                   | min, org               | 365                      |
| Čapek et al. (2015) <sup>2</sup>                      | T + Ae/An              | 4, 20                             | tundra                 | al                      | min                    | 133                      |
| Dai et al. (2002) <sup>3</sup>                        | T                      | 4, 25                             | tundra                 | al, p                   | min, org               | 120                      |
| De Baets et al. (in revision) <sup>4</sup>            | T                      | 7, 17                             | tundra                 | al, p                   | min, org               | 469                      |
| Diáková et al. (in revision) <sup>5</sup>             | T + Ae/An              | 4, 20                             | peat, tundra           | al                      | min, org               | 162                      |
| Dutta et al. (2006) <sup>6</sup>                      | T                      | 5, 15                             | boreal, tundra         | al, p                   | min                    | 390                      |
| Ernakovich et al. (2014) <sup>7</sup>                 | T                      | 1, 15                             | tundra                 | p                       | min, org               | 91                       |
| Estop-Aragones et al. (in prep)                       | T + Ae/An              | 5, 15                             | boreal, peat           | al, p                   | min, org               | 110, 230 <sup>i</sup>    |
| Hobbie et al. (2002 <sup>e</sup> ) <sup>8</sup>       | T                      | 4, 15                             | tundra                 | al                      | org                    | 216                      |
| Iversen et al. (2015a <sup>f</sup> ) <sup>9</sup>     | T + Ae/An              | 2,12                              | tundra                 | al                      | min, org               | 28                       |
| Iversen et al. (2015b <sup>f</sup> )                  | T                      | 4,12                              | tundra                 | al                      | min, org               | 28                       |
| Kane et al. (2013) <sup>10</sup>                      | Ae/An                  | 22                                | peat                   | al                      | org                    | 38                       |
| Knoblauch et al. (2013) <sup>11</sup>                 | Ae/An                  | 4                                 | tundra                 | p                       | min                    | 1242                     |
| Lee et al. (2012) <sup>12</sup>                       | Ae/An                  | 15                                | boreal, tundra         | al, p                   | min, org               | 493                      |
| Lavoie et al. (2011) <sup>13</sup>                    | T                      | 5, 15                             | boreal, tundra         | al, no                  | min, org               | 1086                     |
| Nadelhoffer et al. (1991 <sup>e</sup> ) <sup>14</sup> | T                      | 3, 15                             | tundra                 | al                      | min, org               | 91                       |
| Neff & Hooper (2002 <sup>e</sup> ) <sup>15</sup>      | T                      | 10, 30                            | tundra                 | al                      | org                    | 352                      |
| O'Donnell et al. (2009) <sup>16</sup>                 | T                      | 2, 20                             | boreal                 | al                      | org                    | 48                       |
| Oelbermann et al. (2008 <sup>e</sup> ) <sup>17</sup>  | T                      | 14, 21                            | tundra                 | al                      | min, org               | 84                       |
| Roy Chowdhury et al. (2015) <sup>18</sup>             | T                      | 4,8 (10 <sup>g</sup> )            | tundra                 | al, p                   | min, org               | 60                       |
| Shaver et al. (2006) <sup>19</sup>                    | T                      | 7, 15                             | tundra                 | al                      | org                    | 465                      |
| Treat et al. (2014) <sup>20</sup>                     | T + Ae/An              | -0.5 <sup>h</sup> , 4, 20         | peat                   | al, p                   | min, org               | 27                       |
| Waldrop et al. (2010) <sup>21</sup>                   | Ae/An                  | 5                                 | boreal                 | al, p                   | min, org               | 40                       |
| Waldrop et al. (in prep)                              | T + Ae/An              | 5, 21                             | boreal, peat           | al, p                   | min, org               | 355                      |
| Wickland & Neff (2008 <sup>e</sup> ) <sup>22</sup>    | T                      | 10, 20                            | boreal                 | al, no                  | org                    | 57                       |

<sup>a</sup>Treatment: T = temperature, Ae/An=aerobic and anaerobic

<sup>b</sup>Ecosystem: boreal=boreal forest, peat=peatland, tundra=tundra

<sup>c</sup>Permafrost: al=active layer, no= no permafrost, p=permafrost layer

<sup>d</sup>Soil type: min=mineral (% C<20), org=organic (% C>20)

<sup>e</sup>Data extracted from publication, for all other studies we used raw data

<sup>f</sup>Both Iversen et al. 2015 datasets fall under the same data citation but are independent data sets

<sup>g</sup>Twelve samples were incubated at 4 °C and 8 °C and eight samples were incubated at 4 °C and 10 °C

<sup>h</sup>Anaerobic incubations were performed at -0.5°C and 20°C, for aerobic incubations we used 4°C and 20°C

<sup>i</sup>Anaerobic incubations lasted 110 days (peatland), aerobic incubations lasted either 110 (peatland) or 230 days (boreal forest)

**Table S2** | Effect size estimates ( $y_i$ , log ratio of the means) and corresponding variance ( $v_i$ ) used for meta-analysis of the effect of a 10 °C increase in incubation temperature on total C release (CO<sub>2</sub>-C+CH<sub>4</sub>-C) and on total CO<sub>2</sub>-C equivalent release by accounting for the Global Warming Potential of CO<sub>2</sub> (GWP=1) and CH<sub>4</sub> (GWP=34)<sup>23</sup>. Ecosystem, permafrost, soil type and oxygen are moderators used for multilevel meta-analysis. Nr is the number of observations per citation.

| Citation                                   | Ecosystem <sup>a</sup> | Permafrost <sup>b</sup> | Soil type <sup>c</sup> | Oxygen <sup>d</sup> | Total C |       | CO <sub>2</sub> -C equivalent |       | Nr |
|--------------------------------------------|------------------------|-------------------------|------------------------|---------------------|---------|-------|-------------------------------|-------|----|
|                                            |                        |                         |                        |                     | $y_i$   | $v_i$ | $y_i$                         | $v_i$ |    |
| Bracho et al. (2016) <sup>1</sup>          | tundra                 | al                      | org                    | Ae                  | 0.457   | 0.096 | 0.457                         | 0.096 | 3  |
| Bracho et al. (2016)                       | tundra                 | p                       | org                    | Ae                  | 0.741   | 0.170 | 0.741                         | 0.170 | 3  |
| Bracho et al. (2016)                       | tundra                 | p                       | min                    | Ae                  | 0.710   | 0.036 | 0.710                         | 0.036 | 3  |
| Čapek et al. (2015) <sup>2</sup>           | tundra                 | al                      | min                    | Ae                  | 0.986   | 0.807 | 0.986                         | 0.807 | 2  |
| Čapek et al. (2015)                        | tundra                 | al                      | min                    | An                  | 0.807   | 0.240 | 0.993                         | 0.210 | 2  |
| Dai et al. (2002) <sup>3</sup>             | tundra                 | al                      | min                    | Ae                  | 0.562   | 0.115 | 0.562                         | 0.115 | 1  |
| De Baets et al. (in revision) <sup>4</sup> | tundra                 | al                      | org                    | Ae                  | 0.820   | 0.003 | 0.820                         | 0.003 | 3  |
| De Baets et al. (in revision)              | tundra                 | p                       | org                    | Ae                  | 1.252   | 0.092 | 1.252                         | 0.092 | 3  |
| De Baets et al. (in revision)              | tundra                 | p                       | min                    | Ae                  | 1.464   | 0.212 | 1.464                         | 0.212 | 3  |
| Diáková et al. (in revision) <sup>5</sup>  | peat                   | al                      | org                    | Ae                  | 1.072   | 0.956 | 1.072                         | 0.956 | 1  |
| Dutta et al. (2006) <sup>6</sup>           | tundra                 | p                       | min                    | Ae                  | 0.173   | 0.056 | 0.173                         | 0.056 | 3  |
| Dutta et al. (2006)                        | boreal                 | al                      | min                    | Ae                  | 0.583   | 0.165 | 0.583                         | 0.165 | 3  |
| Dutta et al. (2006)                        | boreal                 | p                       | min                    | Ae                  | 0.272   | 0.040 | 0.272                         | 0.04  | 3  |
| Ernakovich et al. (2014) <sup>7</sup>      | tundra                 | p                       | min                    | Ae                  | 0.880   | 0.035 | 0.880                         | 0.035 | 2  |
| Ernakovich et al. (2014)                   | tundra                 | p                       | min                    | An                  | 0.653   | 0.423 | 0.726                         | 0.505 | 2  |
| Estop-Aragones et al. (in prep)            | peat                   | al                      | org                    | Ae                  | 1.136   | 0.180 | 1.136                         | 0.180 | 8  |
| Estop-Aragones et al. (in prep)            | peat                   | al                      | org                    | An                  | 0.724   | 0.197 | 0.778                         | 0.785 | 8  |
| Estop-Aragones et al. (in prep)            | peat                   | p                       | org                    | Ae                  | 1.121   | 0.064 | 1.121                         | 0.064 | 8  |
| Estop-Aragones et al. (in prep)            | peat                   | p                       | org                    | An                  | 0.774   | 0.070 | 0.783                         | 0.069 | 8  |
| Estop-Aragones et al. (in prep)            | boreal                 | al                      | org                    | Ae                  | 0.917   | 0.088 | 0.917                         | 0.088 | 8  |
| Estop-Aragones et al. (in prep)            | boreal                 | al                      | min                    | Ae                  | 1.040   | 0.102 | 1.040                         | 0.102 | 8  |
| Estop-Aragones et al. (in prep)            | boreal                 | p                       | org                    | Ae                  | 1.013   | 0.378 | 1.013                         | 0.378 | 8  |
| Estop-Aragones et al. (in prep)            | boreal                 | p                       | min                    | Ae                  | 0.991   | 0.126 | 0.991                         | 0.126 | 8  |
| Hobbie et al. (2002) <sup>8</sup>          | tundra                 | al                      | org                    | Ae                  | 1.549   | 0.306 | 1.549                         | 0.306 | 1  |
| Iversen et al. (2015a) <sup>9</sup>        | tundra                 | al                      | org                    | Ae                  | 1.121   | 0.271 | 1.121                         | 0.271 | 4  |
| Iversen et al. (2015a)                     | tundra                 | al                      | org                    | An                  | 0.581   | 0.305 | 1.204                         | 0.315 | 4  |
| Iversen et al. (2015a)                     | tundra                 | al                      | min                    | Ae                  | 0.940   | 0.033 | 0.940                         | 0.033 | 4  |
| Iversen et al. (2015a)                     | tundra                 | al                      | min                    | An                  | 0.599   | 0.010 | 0.688                         | 0.013 | 4  |
| Iversen et al. (2015b)                     | tundra                 | al                      | org                    | Ae                  | 0.917   | 0.123 | 0.917                         | 0.123 | 2  |
| Iversen et al. (2015b)                     | tundra                 | al                      | min                    | Ae                  | 0.925   | 0.038 | 0.925                         | 0.038 | 2  |
| Lavoie et al. (2011) <sup>13</sup>         | tundra                 | al                      | org                    | Ae                  | 0.334   | 0.115 | 0.334                         | 0.115 | 4  |
| Lavoie et al. (2011)                       | tundra                 | al                      | min                    | Ae                  | 0.627   | 0.026 | 0.627                         | 0.026 | 4  |
| Lavoie et al. (2011)                       | boreal                 | no                      | org                    | Ae                  | 0.714   | 0.126 | 0.714                         | 0.126 | 4  |
| Lavoie et al. (2011)                       | boreal                 | no                      | min                    | Ae                  | 0.646   | 0.062 | 0.646                         | 0.062 | 4  |



|                                           |        |    |     |    |       |       |       |       |   |
|-------------------------------------------|--------|----|-----|----|-------|-------|-------|-------|---|
| Nadelhoffer et al. (1991) <sup>14</sup>   | tundra | al | org | Ae | 0.447 | 0.128 | 0.447 | 0.128 | 2 |
| Nadelhoffer et al. (1991)                 | tundra | al | min | Ae | 0.426 | 0.203 | 0.426 | 0.203 | 2 |
| Neff & Hooper (2002) <sup>15</sup>        | tundra | al | org | Ae | 0.383 | 0.067 | 0.383 | 0.067 | 1 |
| O'Donnell et al. (2009) <sup>16</sup>     | boreal | al | org | Ae | 1.060 | 0.043 | 1.060 | 0.043 | 1 |
| Oelbermann et al. (2008) <sup>17</sup>    | tundra | al | org | Ae | 0.980 | 0.082 | 0.980 | 0.082 | 2 |
| Oelbermann et al. (2008)                  | tundra | al | min | Ae | 1.296 | 0.780 | 1.296 | 0.780 | 2 |
| Roy Chowdhury et al. (2015) <sup>18</sup> | tundra | al | org | An | 0.936 | 0.494 | 1.549 | 0.617 | 1 |
| Shaver et al. (2006) <sup>19</sup>        | tundra | al | org | Ae | 0.594 | 0.119 | 0.594 | 0.119 | 1 |
| Treat et al. (2014) <sup>20</sup>         | peat   | al | org | Ae | 0.969 | 0.036 | 0.969 | 0.036 | 5 |
| Treat et al. (2014)                       | peat   | al | org | An | 0.820 | 0.024 | 0.886 | 0.017 | 5 |
| Treat et al. (2014)                       | peat   | p  | org | Ae | 0.690 | 0.020 | 0.690 | 0.020 | 5 |
| Treat et al. (2014)                       | peat   | p  | org | An | 0.520 | 0.054 | 0.529 | 0.050 | 5 |
| Treat et al. (2014)                       | peat   | p  | min | Ae | 0.821 | 0.082 | 0.821 | 0.082 | 5 |
| Waldrop et al. (in prep)                  | peat   | al | org | Ae | 0.812 | 0.055 | 0.812 | 0.055 | 6 |
| Waldrop et al. (in prep)                  | peat   | al | org | An | 0.617 | 0.126 | 0.848 | 0.050 | 6 |
| Waldrop et al. (in prep)                  | boreal | al | min | Ae | 0.579 | 0.161 | 0.579 | 0.161 | 6 |
| Waldrop et al. (in prep)                  | boreal | al | min | An | 0.475 | 0.290 | 0.483 | 0.294 | 6 |
| Waldrop et al. (in prep)                  | boreal | p  | min | Ae | 0.293 | 0.052 | 0.293 | 0.052 | 6 |
| Waldrop et al. (in prep)                  | boreal | p  | min | An | 0.456 | 0.187 | 0.456 | 0.187 | 6 |
| Wickland & Neff (2008) <sup>22</sup>      | boreal | al | org | Ae | 0.500 | 0.000 | 0.500 | 0.000 | 1 |

<sup>a</sup>Ecosystem: boreal = boreal forest, peat=peatland, tundra=tundra

<sup>b</sup>Permafrost: al=active layer, no= no permafrost, p=permafrost layer

<sup>c</sup>Soil type: min=mineral (% C<20), org=organic (% C>20)

<sup>d</sup>Oxygen: Ae=aerobic incubation, An=anaerobic incubation

**Table S3** | Effect size estimates ( $y_i$ , log ratio of the means) and corresponding variance ( $v_i$ ) used for meta-analysis of the effect of a 10 °C increase in incubation temperature on CH<sub>4</sub>-C release. Ecosystem, permafrost, and soil type are moderators used for meta-analysis with mixed effects models. Nr is the number of observations per citation.

| Citation                                  | Ecosystem <sup>a</sup> | Permafrost <sup>b</sup> | Soil type <sup>c</sup> | $y_i$ | $v_i$  | Nr |
|-------------------------------------------|------------------------|-------------------------|------------------------|-------|--------|----|
| Čapek et al. (2015) <sup>2</sup>          | tundra                 | al                      | min                    | 3.142 | 1.117  | 1  |
| Ernakovich et al. (2014) <sup>7</sup>     | tundra                 | p                       | min                    | 0.735 | 0.5155 | 1  |
| Estop-Aragones et al. (in prep.)          | peat                   | al                      | org                    | 0.811 | 1.3675 | 2  |
| Estop-Aragones et al. (in prep.)          | peat                   | p                       | org                    | 1.159 | 0.0841 | 2  |
| Iversen et al. (2015a) <sup>9</sup>       | tundra                 | al                      | org                    | 2.296 | 0.3361 | 2  |
| Iversen et al. (2015a)                    | tundra                 | al                      | min                    | 1.492 | 0.6506 | 2  |
| Roy-Chowdhury et al. (2015) <sup>18</sup> | tundra                 | al                      | org                    | 1.832 | 0.757  | 1  |
| Treat et al. (2014) <sup>20</sup>         | peat                   | al                      | org                    | 2.168 | 0.3172 | 2  |
| Treat et al. (2014)                       | peat                   | p                       | org                    | 1.131 | 0.7972 | 2  |
| Waldrop (in prep.)                        | peat                   | al                      | org                    | 1.006 | 0.0793 | 2  |
| Waldrop (in prep.)                        | boreal                 | al                      | min                    | 2.128 | 1.2665 | 2  |

<sup>a</sup>Ecosystem: boreal = boreal, peat=peat, tundra=tundra

<sup>b</sup>Permafrost: al=active layer, p=permafrost layer

<sup>c</sup>Soil type: min=mineral (% C<20), org=organic (% C>20)

**Table S4 |** Effect size estimates ( $y_i$ , log ratio of the means) and corresponding variance ( $v_i$ ) used for meta-analysis of aerobic to anaerobic total C release ( $\text{CO}_2\text{-C}+\text{CH}_4\text{-C}$ ) and total  $\text{CO}_2\text{-C}$  equivalent release. Ecosystem, permafrost, soil type and temperature are moderators used for meta-analysis with mixed effects models. Nr is the number of observations per citation.

| Citation                                      | Ecosystem <sup>a</sup> | Permafrost <sup>b</sup> | Soil type <sup>c</sup> | Temp <sup>d</sup> | Total C |       | CO <sub>2</sub> -C equivalent |       | Nr |
|-----------------------------------------------|------------------------|-------------------------|------------------------|-------------------|---------|-------|-------------------------------|-------|----|
|                                               |                        |                         |                        |                   | $y_i$   | $v_i$ | $y_i$                         | $v_i$ |    |
| Čapek et al. (2015) <sup>2</sup>              | tundra                 | al                      | min                    | 4                 | 0.411   | 0.574 | 0.397                         | 0.575 | 3  |
| Čapek et al. (2015)                           | tundra                 | al                      | min                    | 12                | 0.884   | 0.456 | 0.607                         | 0.558 | 3  |
| Čapek et al. (2015)                           | tundra                 | al                      | min                    | 20                | 0.636   | 0.543 | 0.165                         | 0.511 | 3  |
| Diáková et al. (in revision) <sup>4</sup>     | peat                   | al                      | org                    | 4                 | 0.259   | 1.093 | 0.259                         | 1.093 | 3  |
| Diáková et al. (in revision)                  | peat                   | al                      | org                    | 12                | 0.915   | 1.041 | 0.915                         | 1.041 | 3  |
| Diáková et al. (in revision)                  | peat                   | al                      | org                    | 20                | 1.016   | 0.551 | 1.015                         | 0.551 | 3  |
| Estop-Aragones et al. (in prep.)              | peat                   | al                      | org                    | 5                 | 1.477   | 0.168 | 0.552                         | 0.447 | 4  |
| Estop-Aragones et al. (in prep.)              | peat                   | al                      | org                    | 15                | 1.884   | 0.206 | 0.896                         | 0.490 | 4  |
| Estop-Aragones et al. (in prep.)              | peat                   | p                       | org                    | 5                 | 1.468   | 0.080 | 1.447                         | 0.079 | 4  |
| Estop-Aragones et al. (in prep.)              | peat                   | p                       | org                    | 15                | 1.815   | 0.054 | 1.785                         | 0.054 | 4  |
| Iversen et al. (2015a) <sup>9</sup>           | tundra                 | al                      | org                    | 2                 | 0.391   | 0.289 | 0.302                         | 0.289 | 4  |
| Iversen et al. (2015a)                        | tundra                 | al                      | org                    | 12                | 1.302   | 0.130 | 0.860                         | 0.143 | 4  |
| Iversen et al. (2015a)                        | tundra                 | al                      | min                    | 2                 | 0.184   | 0.038 | 0.156                         | 0.035 | 4  |
| Iversen et al. (2015a)                        | tundra                 | al                      | min                    | 12                | 0.526   | 0.029 | 0.430                         | 0.030 | 4  |
| Kane et al. (2013) <sup>e</sup> <sup>10</sup> | peat                   | al                      | org                    | 22                | -0.700  | 0.008 | -2.480                        | 0.012 | 1  |
| Knoblauch et al. (2013) <sup>11</sup>         | tundra                 | p                       | min                    | 4                 | 1.387   | 0.016 | -0.071                        | 0.041 | 1  |
| Lee et al. (2012) <sup>12</sup>               | boreal                 | p                       | min                    | 15                | 1.622   | 0.072 | 1.596                         | 0.069 | 4  |
| Lee et al. (2012)                             | tundra                 | al                      | org                    | 15                | 2.401   | 0.045 | 1.575                         | 0.068 | 4  |
| Lee et al. (2012)                             | tundra                 | p                       | org                    | 15                | 1.539   | 0.579 | -0.298                        | 0.727 | 4  |
| Lee et al. (2012)                             | tundra                 | p                       | min                    | 15                | 1.966   | 0.076 | 1.291                         | 0.078 | 4  |
| Treat et al. (2014) <sup>20</sup>             | peat                   | al                      | org                    | -0.5              | -0.102  | 0.157 | -0.109                        | 0.156 | 4  |
| Treat et al. (2014)                           | peat                   | al                      | org                    | 20                | 0.615   | 0.025 | 0.495                         | 0.025 | 4  |
| Treat et al. (2014)                           | peat                   | p                       | org                    | -0.5              | -0.326  | 0.099 | -0.339                        | 0.100 | 4  |
| Treat et al. (2014)                           | peat                   | p                       | org                    | 20                | 0.546   | 0.018 | 0.519                         | 0.018 | 4  |
| Waldrop et al. (2010) <sup>21</sup>           | boreal                 | al                      | org                    | 5                 | 1.487   | 0.164 | 0.566                         | 0.394 | 4  |
| Waldrop et al. (2010)                         | boreal                 | al                      | min                    | 5                 | 1.189   | 0.211 | 1.004                         | 0.139 | 4  |
| Waldrop et al. (2010)                         | boreal                 | p                       | org                    | 5                 | 1.940   | 0.056 | 1.605                         | 0.048 | 4  |
| Waldrop et al. (2010)                         | boreal                 | p                       | min                    | 5                 | 1.870   | 0.205 | 1.264                         | 0.196 | 4  |
| Waldrop et al. (in prep.)                     | boreal                 | al                      | min                    | 5                 | 1.142   | 0.244 | 1.140                         | 0.244 | 6  |
| Waldrop et al. (in prep.)                     | boreal                 | al                      | min                    | 21                | 1.251   | 0.113 | 1.226                         | 0.118 | 6  |
| Waldrop et al. (in prep.)                     | boreal                 | p                       | min                    | 5                 | 1.775   | 0.082 | 1.774                         | 0.082 | 6  |
| Waldrop et al. (in prep.)                     | boreal                 | p                       | min                    | 21                | 0.983   | 0.396 | 0.935                         | 0.381 | 6  |
| Waldrop et al. (in prep.)                     | peat                   | al                      | org                    | 5                 | 1.981   | 0.087 | 1.191                         | 0.042 | 6  |
| Waldrop et al. (in prep.)                     | peat                   | al                      | org                    | 21                | 2.214   | 0.123 | 0.973                         | 0.146 | 6  |

<sup>a</sup>Ecosystem: boreal = boreal forest, peat=peatland, tundra=tundra

<sup>b</sup>Permafrost: al=active layer, p=permafrost layer

<sup>c</sup>Soil type: min=mineral (% C<20), org=organic (% C>20)

<sup>d</sup>Temp= incubation temperature

<sup>e</sup>Kane et al. 2013 not included in final analysis, considered influential study

**Table S5** | Summary of the results of a meta-analysis of the effect of a 10°C increase in incubation temperature on total C release (CO<sub>2</sub>-C + CH<sub>4</sub>-C) and total C release as CO<sub>2</sub>-C equivalent. See Material and methods for detailed description of the response metric and the meta-analysis performed. N is the number of observations per ecosystem, soil type or permafrost.

|                     | Total C   |             |             |             | Total CO <sub>2</sub> -C equivalent |             |             |
|---------------------|-----------|-------------|-------------|-------------|-------------------------------------|-------------|-------------|
|                     | N         | Estimate    | 95% CI      |             | Estimate                            | 95% CI      |             |
|                     |           |             | lower       | upper       |                                     | lower       | upper       |
| <i>Ecosystem</i>    |           |             |             |             |                                     |             |             |
| Boreal Forest       | 14        | 1.88        | 1.5         | 2.37        | 1.88                                | 1.5         | 2.37        |
| Tundra              | 28        | 2.05        | 1.84        | 2.28        | 2.1                                 | 1.89        | 2.33        |
| Peatland            | 12        | 2.23        | 1.95        | 2.55        | 2.29                                | 2.02        | 2.6         |
| <i>Soil Type</i>    |           |             |             |             |                                     |             |             |
| Mineral             | 24        | 1.98        | 1.71        | 2.28        | 2.02                                | 1.74        | 2.34        |
| Organic             | 30        | 2.09        | 1.85        | 2.37        | 2.14                                | 1.89        | 2.43        |
| <i>Permafrost</i>   |           |             |             |             |                                     |             |             |
| No Permafrost       | 2         | 1.95        | 1.31        | 2.91        | 1.95                                | 1.31        | 2.91        |
| Permafrost          | 17        | 2.03        | 1.57        | 2.62        | 2.03                                | 1.58        | 2.62        |
| Active layer        | 35        | 2.07        | 1.87        | 2.3         | 2.13                                | 1.91        | 2.37        |
| <b>Overall mean</b> | <b>54</b> | <b>2.02</b> | <b>1.82</b> | <b>2.24</b> | <b>2.06</b>                         | <b>1.86</b> | <b>2.29</b> |

<sup>a</sup> Sampling sites from the discontinuous permafrost zone where permafrost was not present<sup>20</sup>

**Table S6 |** Summary of the results of a meta-analysis of the effect of a 10°C increase in incubation temperature on CH<sub>4</sub>-C from anaerobic incubations. N is the number of observations per ecosystem, soil type or permafrost. See Material and methods for detailed description of the response metric and meta-analysis performed

|                     | N         | Estimate    | CH <sub>4</sub> -C |              |
|---------------------|-----------|-------------|--------------------|--------------|
|                     |           |             | 95% CI lower       | 95% CI upper |
| <i>Ecosystem</i>    |           |             |                    |              |
| Peatland            | 5         | 3.29        | 2.3                | 4.72         |
| Tundra              | 5         | 6.16        | 2.97               | 12.81        |
| Boreal Forest       | 1         | 8.4         | 0.93               | 76.25        |
| <i>Soil Type</i>    |           |             |                    |              |
| Organic             | 7         | 5.25        | 1.93               | 14.29        |
| Mineral             | 4         | 4.18        | 2.58               | 6.78         |
| <i>Permafrost*</i>  |           |             |                    |              |
| Permafrost          | 3         | 3.01        | 1.82               | 4.99         |
| Active layer        | 8         | 5.62        | 3.14               | 10.07        |
| <b>Overall mean</b> | <b>11</b> | <b>4.26</b> | <b>2.84</b>        | <b>6.38</b>  |

\* Samples from anaerobic incubations only represented active layer and permafrost

**Table S7** | Summary of the results of a meta-analysis of the ratio of aerobic to anaerobic incubation conditions on total C release (CO<sub>2</sub>-C + CH<sub>4</sub>-C) and on total C release as CO<sub>2</sub>-C equivalent by accounting for the GWP of CO<sub>2</sub> (GWP=1) and CH<sub>4</sub> (GWP=34<sup>23</sup>). See Material and methods for detailed description of the response metric and meta-analysis. N is the number of observations per ecosystem, soil type or permafrost. Numbers in light grey are estimates and 95% CI for analyses when Kane et al. (2013<sup>10</sup>) is included.

|                                                       | N         | Total C     |             |             | Total CO <sub>2</sub> -C equivalent |             |            |
|-------------------------------------------------------|-----------|-------------|-------------|-------------|-------------------------------------|-------------|------------|
|                                                       |           | Estimate    | 95% CI      |             | Estimate                            | 95% CI      |            |
|                                                       |           |             | lower       | upper       |                                     | lower       | upper      |
| <i>Ecosystem</i>                                      |           |             |             |             |                                     |             |            |
| Tundra                                                | 11        | 3.32        | 1.57        | 7.03        | 1.68                                | 0.9         | 3.12       |
| Peatland                                              | 13        | 3.46        | 1.54        | 7.77        | 2.48                                | 1.4         | 4.41       |
| Boreal Forest                                         | 9         | 5.0         | 3.99        | 6.27        | 4.17                                | 3.34        | 5.21       |
| <i>Soil Type</i>                                      |           |             |             |             |                                     |             |            |
| Mineral                                               | 14        | 3.34        | 2.11        | 5.28        | 2.18                                | 1.27        | 3.72       |
| Organic                                               | 19        | 4.23        | 2.44        | 7.34        | 2.63                                | 1.79        | 3.87       |
| <i>Permafrost</i>                                     |           |             |             |             |                                     |             |            |
| Active layer                                          | 21        | 3.29        | 1.99        | 5.45        | 2.2                                 | 1.56        | 3.09       |
| Permafrost                                            | 12        | 4.15        | 2.53        | 6.8         | 2.76                                | 1.53        | 4.95       |
| <b>Overall mean</b>                                   | <b>33</b> | <b>3.39</b> | <b>2.22</b> | <b>5.18</b> | <b>2.3</b>                          | <b>1.55</b> | <b>3.4</b> |
| <i>Overall mean with Kane et al. 2013<sup>8</sup></i> | 34        | 2.77        | 1.63        | 4.7         | 1.61                                | 0.77        | 3.39       |

**Table S8** | Multiple regression results for logit transformed ratio of CH<sub>4</sub>-C to total anaerobic C release.

| Coefficients  | Estimate | SE   | DF | t value | P value |
|---------------|----------|------|----|---------|---------|
| Intercept     | -5.20    | 1.64 | 20 | -3.18   | <0.01   |
| Peatland      | 0.91     | 1.43 | 20 | 0.63    | 0.53    |
| Boreal Forest | -4.53    | 1.18 | 20 | -3.84   | <0.01   |
| Temperature   | 0.12     | 0.03 | 20 | 3.61    | <0.01   |



**Table S9** | Information on the amount of heterogeneity in each meta-analysis. All final models were fitted with restricted maximum likelihood.

| Meta-Analysis                                                      |                                     |
|--------------------------------------------------------------------|-------------------------------------|
| <i>Temperature, total C (CO<sub>2</sub>-C + CH<sub>4</sub>-C)</i>  |                                     |
| Q-test                                                             | Q(df = 53) = 98.306, p-val < 0.001  |
| tau <sup>2</sup>                                                   | 0.025                               |
| <i>Temperature, CO<sub>2</sub>-C equivalent</i>                    |                                     |
| Q-test                                                             | Q(df = 53) = 106.108, p-val < 0.001 |
| tau <sup>2</sup>                                                   | 0.026                               |
| <i>Temperature, CH<sub>4</sub>-C</i>                               |                                     |
| Q-test                                                             | Q(df = 10) = 11.395, p-val = 0.328  |
| tau <sup>2</sup>                                                   | 0.096                               |
| <i>Ae/Anaerobic, total C (CO<sub>2</sub>-C + CH<sub>4</sub>-C)</i> |                                     |
| Q-test                                                             | Q(df = 32) = 206.373, p-val < 0.001 |
| tau <sup>2</sup>                                                   | 0.409                               |
| <i>Ae/Anaerobic, CO<sub>2</sub>-C equivalent</i>                   |                                     |
| Q-test                                                             | Q(df = 32) = 142.343, p-val < .001  |
| tau <sup>2</sup>                                                   | 0.334                               |

**Table S10** | Models, their corresponding Akaike Information Criterion corrected for finite sample sizes (AICc), and Akaike weights for meta-analysis of the effect of a 10 °C increase in temperature on total C release (CO<sub>2</sub>-C + CH<sub>4</sub>-C). Bolded model is the final model. yi=effect size estimate, soiltype = soil type, water.treat = oxygen availability, permafrost = permafrost, ecosystem = ecosystem, doi = day of incubation

| Model                                                          | AICc         | Akaike weights |
|----------------------------------------------------------------|--------------|----------------|
| <b>yi ~ 1</b>                                                  | <b>27.72</b> | <b>0.19</b>    |
| yi ~ 1 + water.treat                                           | 28.36        | 0.14           |
| yi ~ 1 + doi                                                   | 29.07        | 0.1            |
| yi ~ 1 + water.treat + doi                                     | 29.24        | 0.09           |
| yi ~ 1 + soiltype                                              | 29.72        | 0.07           |
| yi ~ 1 + ecosystem + water.treat                               | 30.26        | 0.05           |
| yi ~ 1 + ecosystem                                             | 30.39        | 0.05           |
| yi ~ 1 + soiltype + water.treat                                | 30.5         | 0.05           |
| yi ~ 1 + soiltype + doi                                        | 31.3         | 0.03           |
| yi ~ 1 + soiltype + water.treat + doi                          | 31.62        | 0.03           |
| yi ~ 1 + ecosystem + water.treat + doi                         | 31.74        | 0.03           |
| yi ~ 1 + permafrost                                            | 32.01        | 0.02           |
| yi ~ 1 + ecosystem + doi                                       | 32.32        | 0.02           |
| yi ~ 1 + permafrost + water.treat                              | 32.66        | 0.02           |
| yi ~ 1 + ecosystem + soiltype                                  | 32.79        | 0.02           |
| yi ~ 1 + ecosystem + soiltype + water.treat                    | 32.89        | 0.01           |
| yi ~ 1 + permafrost + doi                                      | 33.29        | 0.01           |
| yi ~ 1 + permafrost + water.treat + doi                        | 33.35        | 0.01           |
| yi ~ 1 + ecosystem + permafrost + water.treat                  | 34.37        | 0.01           |
| yi ~ 1 + permafrost + soiltype                                 | 34.39        | 0.01           |
| yi ~ 1 + ecosystem + soiltype + water.treat + doi              | 34.51        | 0.01           |
| yi ~ 1 + ecosystem + permafrost                                | 34.66        | 0.01           |
| yi ~ 1 + ecosystem + soiltype + doi                            | 34.87        | 0.01           |
| yi ~ 1 + ecosystem + permafrost + water.treat + doi            | 35.15        | 0              |
| yi ~ 1 + permafrost + soiltype + water.treat                   | 35.21        | 0              |
| yi ~ 1 + permafrost + soiltype + doi                           | 35.88        | 0              |
| yi ~ 1 + permafrost + soiltype + water.treat + doi             | 36.11        | 0              |
| yi ~ 1 + ecosystem + permafrost + doi                          | 36.27        | 0              |
| yi ~ 1 + ecosystem + permafrost + soiltype + water.treat       | 37.19        | 0              |
| yi ~ 1 + ecosystem + permafrost + soiltype                     | 37.42        | 0              |
| yi ~ 1 + ecosystem + permafrost + soiltype + water.treat + doi | 38.07        | 0              |
| yi ~ 1 + ecosystem + permafrost + soiltype + doi               | 39.16        | 0              |

**Table S11** | Models, their corresponding Akaike Information Criterion corrected for finite sample sizes (AICc), and Akaike weights for weighted meta-analysis of the effect of a 10 °C increase in temperature on total C release calculated as CO<sub>2</sub>-C equivalent. Bolded model is the final model. yi = effect size, soiltype = soil type, water.treat = oxygen availability, permafrost =permafrost, ecosystem = ecosystem, doi = day of incubation

| Model                                                          | AICc         | Akaike weights |
|----------------------------------------------------------------|--------------|----------------|
| <b>yi ~ 1</b>                                                  | <b>30.18</b> | <b>0.2</b>     |
| yi ~ 1 + doi                                                   | 31.09        | 0.13           |
| yi ~ 1 + ecosystem                                             | 31.53        | 0.1            |
| yi ~ 1 + soiltype                                              | 31.92        | 0.08           |
| yi ~ 1 + water.treat                                           | 32.51        | 0.06           |
| yi ~ 1 + ecosystem + doi                                       | 33.1         | 0.05           |
| yi ~ 1 + soiltype + doi                                        | 33.12        | 0.05           |
| yi ~ 1 + water.treat + doi                                     | 33.46        | 0.04           |
| yi ~ 1 + permafrost                                            | 33.73        | 0.03           |
| yi ~ 1 + ecosystem + water.treat                               | 33.82        | 0.03           |
| yi ~ 1 + ecosystem + soiltype                                  | 33.91        | 0.03           |
| yi ~ 1 + soiltype + water.treat                                | 34.35        | 0.03           |
| yi ~ 1 + permafrost + doi                                      | 34.49        | 0.02           |
| yi ~ 1 + ecosystem + permafrost                                | 34.97        | 0.02           |
| yi ~ 1 + ecosystem + water.treat + doi                         | 35.32        | 0.02           |
| yi ~ 1 + soiltype + water.treat + doi                          | 35.59        | 0.01           |
| yi ~ 1 + ecosystem + soiltype + doi                            | 35.63        | 0.01           |
| yi ~ 1 + ecosystem + permafrost + doi                          | 35.91        | 0.01           |
| yi ~ 1 + permafrost + soiltype                                 | 36.06        | 0.01           |
| yi ~ 1 + permafrost + water.treat                              | 36.23        | 0.01           |
| yi ~ 1 + ecosystem + soiltype + water.treat                    | 36.36        | 0.01           |
| yi ~ 1 + permafrost + water.treat + doi                        | 36.95        | 0.01           |
| yi ~ 1 + permafrost + soiltype + doi                           | 37.06        | 0.01           |
| yi ~ 1 + ecosystem + permafrost + water.treat                  | 37.25        | 0.01           |
| yi ~ 1 + ecosystem + permafrost + soiltype                     | 37.74        | 0              |
| yi ~ 1 + ecosystem + permafrost + water.treat + doi            | 37.91        | 0              |
| yi ~ 1 + ecosystem + soiltype + water.treat + doi              | 38.01        | 0              |
| yi ~ 1 + permafrost + soiltype + water.treat                   | 38.67        | 0              |
| yi ~ 1 + ecosystem + permafrost + soiltype + doi               | 38.79        | 0              |
| yi ~ 1 + permafrost + soiltype + water.treat + doi             | 39.64        | 0              |
| yi ~ 1 + ecosystem + permafrost + soiltype + water.treat       | 40.11        | 0              |
| yi ~ 1 + ecosystem + permafrost + soiltype + water.treat + doi | 40.87        | 0              |

**Table S12** | Models, their corresponding Akaike Information Criterion corrected for finite sample sizes (AICc), and Akaike weights for meta-analysis of the effect of a 10 °C increase in temperature on CH<sub>4</sub>-C release. Bolded model is the final model. yi = effect size, soiltype = soil type, permafrost = permafrost, ecosystem = ecosystem, doi = day of incubation

| Model                                            | AICc         | Akaike weights |
|--------------------------------------------------|--------------|----------------|
| <b>yi ~ 1</b>                                    | <b>32.78</b> | <b>0.63</b>    |
| yi ~ 1 + doi                                     | 35.64        | 0.15           |
| yi ~ 1 + permafrost                              | 36.23        | 0.11           |
| yi ~ 1 + soiltype                                | 37.74        | 0.05           |
| yi ~ 1 + permafrost + doi                        | 38.6         | 0.03           |
| yi ~ 1 + ecosystem                               | 42.28        | 0.01           |
| yi ~ 1 + soiltype + doi                          | 42.84        | 0              |
| yi ~ 1 + permafrost + soiltype                   | 43.35        | 0              |
| yi ~ 1 + permafrost + soiltype + doi             | 49.57        | 0              |
| yi ~ 1 + ecosystem + doi                         | 52.02        | 0              |
| yi ~ 1 + ecosystem + soiltype                    | 52.34        | 0              |
| yi ~ 1 + ecosystem + permafrost                  | 52.53        | 0              |
| yi ~ 1 + ecosystem + permafrost + doi            | 67.04        | 0              |
| yi ~ 1 + ecosystem + soiltype + doi              | 69.57        | 0              |
| yi ~ 1 + ecosystem + permafrost + soiltype       | 70.23        | 0              |
| yi ~ 1 + ecosystem + permafrost + soiltype + doi | 103.6        | 0              |

**Table S13** | All possible model subsets, their corresponding Akaike Information Criterion corrected for finite sample sizes (AICc), and Akaike weights for meta-analysis of the effect of aerobic to anaerobic total C release (CO<sub>2</sub>-C+CH<sub>4</sub>-C). Bolded model is the final model. yi = effect size, soiltype = soil type, temp = temperature, permafrost = permafrost, ecosystem = ecosystem, doi = day of incubation

| Model                                                   | AICc         | Akaike weights |
|---------------------------------------------------------|--------------|----------------|
| yi ~ 1 + soiltype + temp                                | 53.97        | 0.35           |
| yi ~ 1 + soiltype + temp + doi                          | 54.02        | 0.34           |
| yi ~ 1 + permafrost + soiltype + temp                   | 56.67        | 0.09           |
| yi ~ 1 + permafrost + soiltype + temp + doi             | 57.05        | 0.07           |
| yi ~ 1 + soiltype                                       | 58.87        | 0.03           |
| yi ~ 1 + soiltype + doi                                 | 59.08        | 0.03           |
| yi ~ 1 + ecosystem + soiltype + temp                    | 59.37        | 0.02           |
| yi ~ 1 + ecosystem + soiltype + temp + doi              | 60.48        | 0.01           |
| yi ~ 1 + permafrost + soiltype                          | 61.47        | 0.01           |
| yi ~ 1 + temp                                           | 61.62        | 0.01           |
| yi ~ 1 + permafrost + soiltype + doi                    | 61.98        | 0.01           |
| yi ~ 1 + ecosystem + permafrost + soiltype + temp       | 62.37        | 0.01           |
| yi ~ 1 + temp + doi                                     | 62.9         | 0              |
| yi ~ 1 + ecosystem + temp                               | 63.11        | 0              |
| <b>yi ~ 1</b>                                           | <b>63.89</b> | <b>0</b>       |
| yi ~ 1 + ecosystem + soiltype                           | 64           | 0              |
| yi ~ 1 + ecosystem + permafrost + soiltype + temp + doi | 64.02        | 0              |
| yi ~ 1 + permafrost + temp                              | 64.39        | 0              |
| yi ~ 1 + ecosystem + soiltype + doi                     | 65.12        | 0              |
| yi ~ 1 + doi                                            | 65.29        | 0              |
| yi ~ 1 + ecosystem + temp + doi                         | 65.4         | 0              |
| yi ~ 1 + permafrost + temp + doi                        | 65.83        | 0              |
| yi ~ 1 + ecosystem + permafrost + temp                  | 66.3         | 0              |
| yi ~ 1 + permafrost                                     | 66.48        | 0              |
| yi ~ 1 + ecosystem + permafrost + soiltype              | 66.94        | 0              |
| yi ~ 1 + ecosystem                                      | 67.09        | 0              |
| yi ~ 1 + permafrost + doi                               | 68.01        | 0              |
| yi ~ 1 + ecosystem + permafrost + soiltype + doi        | 68.5         | 0              |
| yi ~ 1 + ecosystem + permafrost + temp + doi            | 68.9         | 0              |
| yi ~ 1 + ecosystem + doi                                | 69.14        | 0              |
| yi ~ 1 + ecosystem + permafrost                         | 70.06        | 0              |
| yi ~ 1 + ecosystem + permafrost + doi                   | 72.39        | 0              |

**Table S14** All possible model subsets, their corresponding Akaike Information Criterion corrected for finite sample sizes (AICc), and Akaike weights for meta-analysis of the effect of aerobic to anaerobic C release calculated as CO<sub>2</sub>-C equivalent. Bolded model is the final model. yi = effect size, soiltype = soil type, temp = temperature, permafrost = permafrost, ecosystem = ecosystem, doi = day of incubation

| Model                                                   | AICc         | Akaike weights |
|---------------------------------------------------------|--------------|----------------|
| yi ~ 1 + temp                                           | 60.55        | 0.14           |
| yi ~ 1 + permafrost + temp                              | 60.8         | 0.12           |
| yi ~ 1 + ecosystem + soiltype + temp                    | 61.65        | 0.08           |
| yi ~ 1 + ecosystem + temp                               | 62.4         | 0.06           |
| <b>yi ~ 1</b>                                           | <b>62.43</b> | <b>0.06</b>    |
| yi ~ 1 + permafrost + soiltype + temp                   | 62.49        | 0.05           |
| yi ~ 1 + temp + doi                                     | 62.59        | 0.05           |
| yi ~ 1 + permafrost + temp + doi                        | 62.63        | 0.05           |
| yi ~ 1 + soiltype + temp                                | 62.82        | 0.05           |
| yi ~ 1 + permafrost                                     | 63.2         | 0.04           |
| yi ~ 1 + ecosystem + soiltype                           | 63.63        | 0.03           |
| yi ~ 1 + ecosystem                                      | 63.66        | 0.03           |
| yi ~ 1 + ecosystem + permafrost + soiltype + temp       | 63.71        | 0.03           |
| yi ~ 1 + doi                                            | 64.19        | 0.02           |
| yi ~ 1 + ecosystem + permafrost + temp                  | 64.52        | 0.02           |
| yi ~ 1 + permafrost + doi                               | 64.58        | 0.02           |
| yi ~ 1 + soiltype                                       | 64.73        | 0.02           |
| yi ~ 1 + permafrost + soiltype + temp + doi             | 64.83        | 0.02           |
| yi ~ 1 + ecosystem + soiltype + temp + doi              | 65.05        | 0.01           |
| yi ~ 1 + permafrost + soiltype                          | 65.11        | 0.01           |
| yi ~ 1 + soiltype + temp + doi                          | 65.22        | 0.01           |
| yi ~ 1 + ecosystem + temp + doi                         | 65.26        | 0.01           |
| yi ~ 1 + ecosystem + permafrost + soiltype              | 65.79        | 0.01           |
| yi ~ 1 + ecosystem + permafrost                         | 66           | 0.01           |
| yi ~ 1 + ecosystem + doi                                | 66.32        | 0.01           |
| yi ~ 1 + ecosystem + soiltype + doi                     | 66.62        | 0.01           |
| yi ~ 1 + soiltype + doi                                 | 66.81        | 0.01           |
| yi ~ 1 + permafrost + soiltype + doi                    | 66.93        | 0.01           |
| yi ~ 1 + ecosystem + permafrost + soiltype + temp + doi | 67.2         | 0.01           |
| yi ~ 1 + ecosystem + permafrost + temp + doi            | 67.39        | 0              |
| yi ~ 1 + ecosystem + permafrost + doi                   | 68.58        | 0              |
| yi ~ 1 + ecosystem + permafrost + soiltype + doi        | 68.76        | 0              |

**Table S15** | All possible model subsets, their corresponding Akaike Information Criterion corrected for finite sample sizes (AICc), and Akaike weights for regression analysis of logit transformed ratio of CH<sub>4</sub>-C to total anaerobic C release. Bolded model is the final model. yi = effect size, soiltype = soil type, temp = temperature, permafrost = permafrost, ecosystem = ecosystem, doi = day of incubation

| Model                                                            | AICc          | Akaike weights |
|------------------------------------------------------------------|---------------|----------------|
| <b>logit.ratio ~ 1 + ecosystem + temp</b>                        | <b>146.45</b> | <b>0.41</b>    |
| logit.ratio ~ 1 + ecosystem + permafrost + temp                  | 148.00        | 0.19           |
| logit.ratio ~ 1 + ecosystem + temp + doi                         | 148.87        | 0.12           |
| logit.ratio ~ 1 + ecosystem + soiltype + temp                    | 149.01        | 0.11           |
| logit.ratio ~ 1 + ecosystem + permafrost + temp + doi            | 150.47        | 0.05           |
| logit.ratio ~ 1 + ecosystem + permafrost + soiltype + temp       | 151.08        | 0.04           |
| logit.ratio ~ 1 + ecosystem + soiltype + temp + doi              | 151.53        | 0.03           |
| logit.ratio ~ 1 + ecosystem                                      | 153.71        | 0.01           |
| logit.ratio ~ 1 + ecosystem + permafrost + soiltype + temp + doi | 153.72        | 0.01           |
| logit.ratio ~ 1 + ecosystem + doi                                | 156.00        | 0.00           |
| logit.ratio ~ 1 + ecosystem + permafrost                         | 156.00        | 0.00           |
| logit.ratio ~ 1 + ecosystem + soiltype                           | 156.31        | 0.00           |
| logit.ratio ~ 1 + ecosystem + permafrost + doi                   | 158.28        | 0.00           |
| logit.ratio ~ 1 + ecosystem + soiltype + doi                     | 158.62        | 0.00           |
| logit.ratio ~ 1 + soiltype + temp                                | 158.84        | 0.00           |
| logit.ratio ~ 1 + ecosystem + permafrost + soiltype              | 159.02        | 0.00           |
| logit.ratio ~ 1 + soiltype + temp + doi                          | 159.18        | 0.00           |
| logit.ratio ~ 1 + soiltype                                       | 160.27        | 0.00           |
| logit.ratio ~ 1 + soiltype + doi                                 | 160.31        | 0.00           |
| logit.ratio ~ 1 + permafrost + soiltype + temp                   | 160.38        | 0.00           |
| logit.ratio ~ 1 + permafrost + soiltype + temp + doi             | 160.54        | 0.00           |
| logit.ratio ~ 1                                                  | 161.39        | 0.00           |
| logit.ratio ~ 1 + ecosystem + permafrost + soiltype + doi        | 161.40        | 0.00           |
| logit.ratio ~ 1 + permafrost + soiltype + doi                    | 162.05        | 0.00           |
| logit.ratio ~ 1 + doi                                            | 162.17        | 0.00           |
| logit.ratio ~ 1 + permafrost + soiltype                          | 162.26        | 0.00           |
| logit.ratio ~ 1 + temp                                           | 162.27        | 0.00           |
| logit.ratio ~ 1 + permafrost                                     | 163.30        | 0.00           |
| logit.ratio ~ 1 + temp + doi                                     | 163.32        | 0.00           |
| logit.ratio ~ 1 + permafrost + temp                              | 163.58        | 0.00           |
| logit.ratio ~ 1 + permafrost + doi                               | 163.63        | 0.00           |
| logit.ratio ~ 1 + permafrost + temp + doi                        | 164.18        | 0.00           |

**Table S16** | Variable importance values for each Meta-Analysis

| Meta-Analysis                                                      | Moderators        | Variance importance value |
|--------------------------------------------------------------------|-------------------|---------------------------|
| <i>Temperature, total C (CO<sub>2</sub>-C + CH<sub>4</sub>-C)</i>  |                   |                           |
|                                                                    | Ecosystem         | 0.22                      |
|                                                                    | Permafrost        | 0.09                      |
|                                                                    | Soil type         | 0.24                      |
|                                                                    | Water treatment   | 0.45                      |
|                                                                    | Day of incubation | 0.34                      |
| <i>Temperature, CO<sub>2</sub>-C equivalent</i>                    |                   |                           |
|                                                                    | Ecosystem         | 0.29                      |
|                                                                    | Permafrost        | 0.13                      |
|                                                                    | Soil type         | 0.24                      |
|                                                                    | Water treatment   | 0.23                      |
|                                                                    | Day of incubation | 0.36                      |
| <i>Temperature, CH<sub>4</sub>-C (CH<sub>4</sub>-C)</i>            |                   |                           |
|                                                                    | Ecosystem         | 0.01                      |
|                                                                    | Permafrost        | 0.15                      |
|                                                                    | Soil type         | 0.06                      |
|                                                                    | Day of incubation | 0.19                      |
| <i>Ae/Anaerobic, total C (CO<sub>2</sub>-C + CH<sub>4</sub>-C)</i> |                   |                           |
|                                                                    | Ecosystem         | 0.04                      |
|                                                                    | Permafrost        | 0.19                      |
|                                                                    | Soil type         | 0.97                      |
|                                                                    | Temperature       | 0.9                       |
|                                                                    | Day of incubation | 0.46                      |
| <i>Ae/Anaerobic, total CO<sub>2</sub>-C equivalent</i>             |                   |                           |
|                                                                    | Ecosystem         | 0.32                      |
|                                                                    | Permafrost        | 0.4                       |
|                                                                    | Soil type         | 0.36                      |
|                                                                    | Temperature       | 0.71                      |
|                                                                    | Day of incubation | 0.24                      |
| <i>Regression analysis, CH<sub>4</sub>-C to total C</i>            |                   |                           |
|                                                                    | Ecosystem         | 1.0                       |
|                                                                    | Permafrost        | 0.3                       |
|                                                                    | Soil type         | 0.21                      |
|                                                                    | Temperature       | 0.97                      |
|                                                                    | Day of incubation | 0.23                      |



**Table S17:** Number (Nr) of samples used in meta-analysis for ratio of aerobic to anaerobic C release.

| Citation                                  | Total Nr of sample pairs <sup>a</sup> | Nr of anaerobic samples reaching max. CH <sub>4</sub> rate | Percentage (%) of samples that reached max. CH <sub>4</sub> rate |
|-------------------------------------------|---------------------------------------|------------------------------------------------------------|------------------------------------------------------------------|
| Čapek et al. (2015) <sup>2</sup>          | 9                                     | 6                                                          | 67                                                               |
| Diáková et al. (in revision) <sup>5</sup> | 9                                     | 0                                                          | 0                                                                |
| Estop-Aragones et al. (in prep)           | 48                                    | 31                                                         | 65                                                               |
| Iversen et al. (2015a) <sup>9</sup>       | 41                                    | 11                                                         | 27                                                               |
| Kane et al. (2013) <sup>10</sup>          | 48                                    | 27                                                         | 56                                                               |
| Knoblauch et al. (2013) <sup>11</sup>     | 25                                    | 13                                                         | 52                                                               |
| Lee et al. (2012) <sup>12</sup>           | 28                                    | 26                                                         | 93                                                               |
| Treat et al. (2014) <sup>20</sup>         | 29                                    | 19                                                         | 66                                                               |
| Waldrop et al. (2010) <sup>21</sup>       | 16                                    | 16                                                         | 100                                                              |
| Waldrop et al. (in prep)                  | 60                                    | 31                                                         | 52                                                               |

<sup>a</sup> One sample pair is a set of soil that has been incubated under aerobic and anaerobic conditions

**Table S18:** Summary of the results of the sensitivity analysis. meta-analyses of the ratio of aerobic to anaerobic incubation conditions on total C release (CO<sub>2</sub>-C + CH<sub>4</sub>-C) and on total C release as CO<sub>2</sub>-C equivalent by accounting for the GWP of CO<sub>2</sub> (GWP=1) and CH<sub>4</sub> (GWP=34<sup>23</sup>). N are numbers of observations (not equal to number of samples as multiple samples could be grouped into one observation). Letters a-c in the headers refer to the three analyses performed as part of the sensitivity analysis.

|                                    | a) All studies and samples |             |             |             | b) Studies with > 60% of samples reaching max. CH <sub>4</sub> rate |             |             |             | c) Only samples included that reached maximum CH <sub>4</sub> rate |             |             |             |
|------------------------------------|----------------------------|-------------|-------------|-------------|---------------------------------------------------------------------|-------------|-------------|-------------|--------------------------------------------------------------------|-------------|-------------|-------------|
|                                    | N                          | Estimate    | 95% CI      |             | N                                                                   | Estimate    | 95% CI      |             | N                                                                  | Estimate    | 95% CI      |             |
|                                    |                            |             | lower       | upper       |                                                                     |             | lower       | upper       |                                                                    |             | lower       | upper       |
| <i>Ecosystem</i>                   | <b>Total C</b>             |             |             |             |                                                                     |             |             |             |                                                                    |             |             |             |
| Tundra                             | 11                         | 3.32        | 1.57        | 7.03        | 6                                                                   | 4.34        | 0.98        | 19.24       | 8                                                                  | 3.82        | 2.07        | 7.03        |
| Peatland                           | 13                         | 3.46        | 1.54        | 7.77        | 8                                                                   | 2.69        | 0.73        | 9.95        | 9                                                                  | 4.1         | 1.52        | 11.06       |
| Boreal Forest                      | 9                          | 5.0         | 3.99        | 6.27        | 5                                                                   | 5.52        | 4.15        | 7.33        | 8                                                                  | 5.1         | 3.89        | 6.69        |
| <i>Soil Type</i>                   |                            |             |             |             |                                                                     |             |             |             |                                                                    |             |             |             |
| Mineral                            | 14                         | 3.34        | 2.11        | 5.28        | 7                                                                   | 4.09        | 2.21        | 7.6         | 11                                                                 | 3.36        | 2.35        | 4.8         |
| Organic                            | 19                         | 4.23        | 2.44        | 7.34        | 12                                                                  | 4.47        | 1.95        | 10.23       | 14                                                                 | 5.04        | 2.91        | 8.71        |
| <i>Permafrost</i>                  |                            |             |             |             |                                                                     |             |             |             |                                                                    |             |             |             |
| Active layer                       | 21                         | 3.29        | 1.99        | 5.45        | 10                                                                  | 3.76        | 1.86        | 7.6         | 15                                                                 | 3.9         | 2.33        | 6.53        |
| Permafrost                         | 12                         | 4.15        | 2.53        | 6.8         | 9                                                                   | 4.03        | 1.88        | 8.62        | 10                                                                 | 3.9         | 2.38        | 6.41        |
| <b>Overall mean</b>                | <b>33</b>                  | <b>3.39</b> | <b>2.22</b> | <b>5.18</b> | <b>19</b>                                                           | <b>3.65</b> | <b>1.91</b> | <b>6.98</b> | <b>25</b>                                                          | <b>3.81</b> | <b>2.53</b> | <b>5.73</b> |
| <b>CO<sub>2</sub>-C equivalent</b> |                            |             |             |             |                                                                     |             |             |             |                                                                    |             |             |             |
| <i>Ecosystem</i>                   |                            |             |             |             |                                                                     |             |             |             |                                                                    |             |             |             |
| Tundra                             | 11                         | 1.68        | 0.9         | 3.12        | 6                                                                   | 2.58        | 1.0         | 6.64        | 8                                                                  | 1.68        | 0.79        | 3.6         |
| Peatland                           | 13                         | 2.48        | 1.4         | 4.41        | 8                                                                   | 2.28        | 0.72        | 7.23        | 9                                                                  | 2.53        | 1.28        | 4.99        |
| Boreal Forest                      | 9                          | 4.17        | 3.34        | 5.21        | 5                                                                   | 4.17        | 3.16        | 5.5         | 8                                                                  | 3.71        | 2.74        | 5.02        |
| <i>Soil Type</i>                   |                            |             |             |             |                                                                     |             |             |             |                                                                    |             |             |             |
| Mineral                            | 14                         | 2.18        | 1.27        | 3.72        | 7                                                                   | 2.95        | 1.69        | 5.14        | 11                                                                 | 1.93        | 1.08        | 3.43        |
| Organic                            | 19                         | 2.63        | 1.79        | 3.87        | 12                                                                  | 2.67        | 1.46        | 4.87        | 14                                                                 | 2.63        | 1.75        | 3.96        |
| <i>Permafrost</i>                  |                            |             |             |             |                                                                     |             |             |             |                                                                    |             |             |             |
| Active layer                       | 21                         | 2.2         | 1.56        | 3.09        | 10                                                                  | 2.25        | 1.39        | 3.63        | 15                                                                 | 2.36        | 1.68        | 3.3         |
| Permafrost                         | 12                         | 2.76        | 1.53        | 4.95        | 9                                                                   | 3.15        | 1.66        | 5.99        | 10                                                                 | 2.32        | 1.2         | 4.48        |
| <b>Overall mean</b>                | <b>33</b>                  | <b>2.3</b>  | <b>1.55</b> | <b>3.4</b>  | <b>19</b>                                                           | <b>2.7</b>  | <b>1.62</b> | <b>4.49</b> | <b>25</b>                                                          | <b>2.26</b> | <b>1.44</b> | <b>3.54</b> |

## References:

1. Bracho, R. *et al.* Temperature sensitivity of organic matter decomposition of permafrost-region soils during laboratory incubations. *Soil Biol Biochem* **97**, 1-14, (2016).
2. Čapek, P. *et al.* The effect of warming on the vulnerability of subducted organic carbon in arctic soils. *Soil Biol Biochem* **90**, 19-29, (2015).
3. Dai, X. Y., White, D. & Ping, C. L. Comparing bioavailability in five Arctic soils by pyrolysis-gas chromatography/mass spectrometry. *Journal of Analytical and Applied Pyrolysis* **62**, 249-258, (2002).
4. De Baets, S. *et al.* Investigating the controls on soil organic matter decomposition in tussock tundra soil and permafrost after fire. *Soil Biol. Biochem*, (in revision).
5. Diáková, K. *et al.* Carbon loss from old permafrost-affected peat deposits under changing environmental conditions. *FEMS Microbiology Ecology*, (in revision).
6. Dutta, K., Schuur, E. A. G., Neff, J. C. & Zimov, S. A. Potential carbon release from permafrost soils of Northeastern Siberia. *Glob. Change. Biol* **12**, 2336-2351, (2006).
7. Ernakovich, J., Lynch, L., Schimel, J. & Wallenstein, M. D. Soil chemistry and characteristics measured for incubation of microbial communities in permafrost *UCAR/NCAR-CISL-ACADIS* (2014) <http://dx.doi.org/10.5065/D66M34S3>
8. Hobbie, S. E., Miley, T. A. & Weiss, M. S. Carbon and nitrogen cycling in soils from acidic and nonacidic tundra with different glacial histories in Northern Alaska. *Ecosystems* **5**, 761-774, (2002).
9. Iversen, C. M. *et al.* Active Layer Soil Carbon and Nutrient Mineralization, Barrow, Alaska, 2012. Oak Ridge National Laboratory, Oak Ridge, Tennessee, USA. *Carbon Dioxide Information Analysis Center Next Generation Ecosystem Experiments Arctic Data Collection* (2015) <http://dx.doi.org/10.5440/1185213>.
10. Kane, E. S. *et al.* Response of anaerobic carbon cycling to water table manipulation in an Alaskan rich fen. *Soil Biol. Biochem* **58**, 50-60, (2013).
11. Knoblauch, C., Beer, C., Sosnin, A., Wagner, D. & Pfeiffer, E.-M. Predicting long-term carbon mineralization and trace gas production from thawing permafrost of Northeast Siberia. *Glob. Change. Biol* **19**, 1160-1172, (2013).
12. Lee, H., Schuur, E. A. G., Inglett, K. S., Lavoie, M. & Chanton, J. P. The rate of permafrost carbon release under aerobic and anaerobic conditions and its potential effects on climate. *Glob. Change. Biol* **18**, 515-527, (2012).
13. Lavoie, M., Mack, M. C. & Schuur, E. A. G. Effects of elevated nitrogen and temperature on carbon and nitrogen dynamics in Alaskan arctic and boreal soils. *Journal of Geophysical Research-Biogeosciences* **116**, (2011).
14. Nadelhoffer, K. J., Giblin, A. E., Shaver, G. R. & Laundre, J. A. Effects of temperature and substrate quality on element mineralization in 6 arctic soils. *Ecology* **72**, 242-253, (1991).
15. Neff, J. C. & Hooper, D. U. Vegetation and climate controls on potential CO<sub>2</sub>, DOC and DON production in northern latitude soils. *Glob. Change. Biol* **8**, 872-884, (2002).
16. O'Donnell, J. A. *et al.* Interactive Effects of Fire, Soil Climate, and Moss on CO(2) Fluxes in Black Spruce Ecosystems of Interior Alaska. *Ecosystems* **12**, 57-72, (2009).

17. Oelbermann, M., English, M. & Schiff, S. L. Evaluating carbon dynamics and microbial activity in arctic soils under warmer temperatures. *Canadian Journal of Soil Science* **88**, 31-44, (2008).
18. Roy Chowdhury, T. *et al.* Stoichiometry and temperature sensitivity of methanogenesis and CO<sub>2</sub> production from saturated polygonal tundra in Barrow, Alaska. *Glob. Change. Biol* **21**, 722-737, (2015).
19. Shaver, G. R. *et al.* Carbon turnover in Alaskan tundra soils: effects of organic matter quality, temperature, moisture and fertilizer. *J Ecol* **94**, 740-753, (2006).
20. Treat, C. C. *et al.* Temperature and peat type control CO<sub>2</sub> and CH<sub>4</sub> production in Alaskan permafrost peats. *Glob. Change. Biol* **20**, 2674-2686, (2014).
21. Waldrop, M. P. *et al.* Molecular investigations into a globally important carbon pool: permafrost-protected carbon in Alaskan soils. *Glob. Change. Biol* **16**, 2543-2554, (2010).
22. Wickland, K. P. & Neff, J. C. Decomposition of soil organic matter from boreal black spruce forest: environmental and chemical controls. *Biogeochemistry* **87**, 29-47, (2008).
23. Myhre, G. *et al.* Anthropogenic and Natural Radiative Forcing. In: *Climate Change 2013: The Physical Science Basis. Contributions of Working Group I to the Fifth Assessment Report of the Intergovernmental Panel on Climate Change*. 659-740 (Cambridge University Press, Cambridge, United Kingdom and New York, NY, USA, 2013).
